# The British Journal of Diabetes & Vascular Disease

<http://dvd.sagepub.com>

---

**Review: The pros and cons of continuous subcutaneous insulin infusion (CSII) therapy in the paediatric population and practical considerations when choosing and initiating CSII in children**

Fiona Campbell

*British Journal of Diabetes & Vascular Disease* 2008; 8; S6

DOI: 10.1177/1474651408098138

The online version of this article can be found at:  
[http://dvd.sagepub.com/cgi/content/abstract/8/1\\_suppl/S6](http://dvd.sagepub.com/cgi/content/abstract/8/1_suppl/S6)

---

Published by:

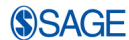

<http://www.sagepublications.com>

Additional services and information for *The British Journal of Diabetes & Vascular Disease* can be found at:

**Email Alerts:** <http://dvd.sagepub.com/cgi/alerts>

**Subscriptions:** <http://dvd.sagepub.com/subscriptions>

**Reprints:** <http://www.sagepub.com/journalsReprints.nav>

**Permissions:** <http://www.sagepub.co.uk/journalsPermissions.nav>

**Citations** [http://dvd.sagepub.com/cgi/content/refs/8/1\\_suppl/S6](http://dvd.sagepub.com/cgi/content/refs/8/1_suppl/S6)

# The pros and cons of continuous subcutaneous insulin infusion (CSII) therapy in the paediatric population and practical considerations when choosing and initiating CSII in children

FIONA CAMPBELL

## Abstract

**C**SI (continuous subcutaneous insulin infusion), has the potential to improve long-term glycaemic control in many patients with type 1 diabetes. CSII may also reduce the incidence of hypoglycaemic episodes, especially in patients prone to hypoglycaemia, and may reduce glycaemic variability. A pivotal advantage of CSII over MDIs (multiple daily injection), especially in children, is its superior convenience and flexibility. Programmable basal rates are delivered automatically and with unprecedented precision, while bolus doses can easily be used to titrate insulin exposure around meals and activities and to correct hyperglycaemia. The subcutaneous cannula needs to be re-sited only once every 2–3 days. In light of these advantages, CSII is generally preferred by children and parents. Careful patient selection is crucial, however, as CSII users and their carers must be willing and able to use the equipment correctly, as well as to perform general aspects of intensive self-care. Accordingly, CSII should be initiated only by a specialist, multidisciplinary team and in conjunction with a structured, ongoing educational and monitoring programme. Factors affecting the selection of a particular pump include the size and weight of the device, ease of use, range of dose modes and increments, cost, warranty and customer services.

*Br J Diabetes Vasc Dis* 2008; **8**(Suppl 1): S6–10

**Key words:** continuous insulin infusion, diabetes mellitus, insulin, paediatrics, pump

Correspondence to: Dr Fiona Campbell

Department of Paediatrics, Leeds Teaching Hospitals Trust, Beckett Street, Leeds, West Yorkshire, LS9 7TF, UK.

Tel: +44 (0) 113 2065924; Fax: +44 (0) 113 2065405

E-mail: Fiona.Campbell@leedstri.nhs.uk

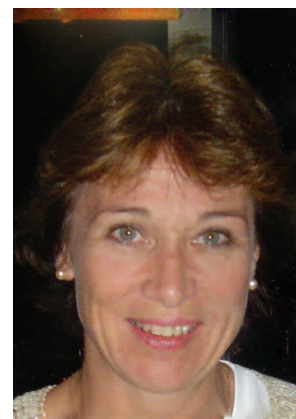

Fiona Campbell

## Abbreviations and acronyms

|                   |                                                       |
|-------------------|-------------------------------------------------------|
| CSII              | continuous subcutaneous insulin infusion              |
| DKA               | diabetic ketoacidosis                                 |
| HbA <sub>1c</sub> | glycated haemoglobin                                  |
| MDI               | multiple daily injection                              |
| NICE              | National Institute for Health and Clinical Excellence |

## Introduction

CSII therapy for patients with type 1 diabetes is designed to mimic physiological insulin exposure by delivering a basal rate throughout the day and bolus doses around all carbohydrate intake (both snacks and major meals). CSII therapy aims to improve glycaemic control, both in terms of avoiding chronic hyperglycaemia and short-term hypoglycaemic and hyperglycaemic swings, while optimising the flexibility of therapy and improving patients' well-being.

NICE has recently updated its guidelines on CSII use, including in children with type 1 diabetes.<sup>1</sup> NICE now recommends CSII as a treatment option for children aged 12 years or older with type

**Figure 1.** HbA<sub>1c</sub> levels in insulin-treated children with type 1 diabetes following randomised conversion to CSII (n=16) or MDI with insulin glargine (n=16). The difference between CSII (◆) and glargine (■) at baseline is not significant. At 16 weeks, HbA<sub>1c</sub> levels in the CSII group were significantly lower than at baseline (p<0.02) and versus glargine (p<0.05)

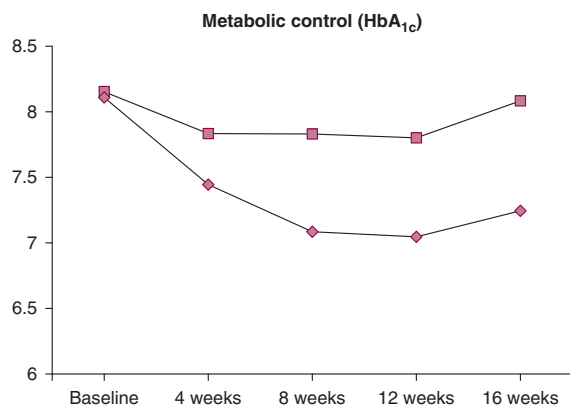

Reproduced with kind permission from Doyle *et al.*<sup>6</sup>  
Copyright © 2004 American Diabetes Association. From *Diabetes Care* 2004, **27**: 1554–8. Reprinted with permission from The American Diabetes Association.

1 diabetes in whom MDI insulin therapy has caused disabling hypoglycaemia when a target HbA<sub>1c</sub> level of 7.5% has been attempted, or when HbA<sub>1c</sub> levels remain high (≥8.5%) during MDI therapy.<sup>1</sup> CSII is recommended in children aged under 12 years whenever the use of MDI is impractical or inappropriate.

These recommendations may help to improve paediatric access to CSII, which is at present low and variable across the UK. However, the management of type 1 diabetes in paediatric patients is subject to a variety of specific challenges that influence the selection and implementation of therapy. The paediatric population is heterogeneous in its presentation of diabetes, as well as in the physical, mental and emotional characteristics of presenting infants, children, adolescents and families. Insulin therapy, however it is delivered, is complicated by various aspects of childhood, including variable insulin sensitivity; level of self-care and parent/carer support at home, school and nursery; irregular meal intake and physical activity; susceptibility to hypoglycaemia; and communication difficulties.<sup>2</sup> Diabetes teams caring for teenage and adolescent patients must also contend with the hormonal and psychosocial changes associated with puberty.

This article discusses the advantages and disadvantages of CSII in paediatric patients, in light of the updated NICE guidelines.

## Advantages of CSII in paediatric patients

### Glycaemic control

Meta-analyses of randomised controlled trials have concluded that CSII is associated with better long-term glycaemic control than is MDI in patients with type 1 diabetes, as measured by HbA<sub>1c</sub> level.<sup>3–5</sup> Most recently, Pickup and Sutton found that CSII

was associated with a significant reduction in HbA<sub>1c</sub> of 0.62% (95% confidence intervals 0.47–0.78%).<sup>5</sup>

In children and adolescents, short-term studies have found CSII to be more effective<sup>6</sup> (figure 1) or as effective<sup>7–10</sup> as MDI. Numerous 'before and after' cohort studies have provided more substantive evidence of a significant benefit when paediatric patients on MDI were converted to CSII.<sup>1</sup> Although these studies offer less robust data, they represent a large population in clinical practice that in some cases has been followed-up for a period of several years. For example, Weinzimer *et al.* found that HbA<sub>1c</sub> levels continued to fall even 4 years after conversion to CSII in young children (mean age 4.5 years; n=65).<sup>11</sup> Moreover, significant reductions were seen in patients cared for by paid caregivers as well as those cared for by parents. Sustained benefits were also observed in older children, with a mean age of 12 years (n=42), followed-up for 4 years after the initiation of CSII.<sup>12</sup>

Recently, Jakisch *et al.* reported data from a large prospective study of paediatric patients initiated on CSII or MDI in Germany (n=434 matched pairs).<sup>13</sup> The statistically significantly superior HbA<sub>1c</sub> control achieved by CSII during the first year (7.5% versus 7.7% with MDI; p=0.006) was not maintained by the third year (8.1% versus 8.0%, respectively; p=0.99). Nonetheless, CSII was associated with statistically significant reductions in hypoglycaemic episodes, DKA episodes and insulin requirements versus MDI throughout the follow-up period: valuable outcomes in themselves.

Our own clinical experience supports a 0.5% improvement in HbA<sub>1c</sub> maintained for up to 5 years when CSII is initiated in children (paper submitted) and we find a particular benefit in certain groups of children (table 1). Other evidence

**Table 1.** Potential indications for CSII in children with type 1 diabetes

| Absolute indications                                                                                                                                                                                                           | Relative indications                                                                                                                                                                                                                                                        |
|--------------------------------------------------------------------------------------------------------------------------------------------------------------------------------------------------------------------------------|-----------------------------------------------------------------------------------------------------------------------------------------------------------------------------------------------------------------------------------------------------------------------------|
| <b>Children</b>                                                                                                                                                                                                                | <b>Children</b>                                                                                                                                                                                                                                                             |
| <ul style="list-style-type: none"> <li>• Infants and small children (in whom insulin therapy is hard to manage)</li> <li>• Recurrent, severe hypoglycaemia</li> <li>• Feeding difficulties</li> <li>• Needle phobia</li> </ul> | <ul style="list-style-type: none"> <li>• High glucose variability</li> <li>• Propensity for ketosis</li> <li>• CSII likely to improve quality of life</li> </ul>                                                                                                            |
|                                                                                                                                                                                                                                | <b>Teenagers</b>                                                                                                                                                                                                                                                            |
|                                                                                                                                                                                                                                | <ul style="list-style-type: none"> <li>• Control has deteriorated</li> <li>• Insulin dose omissions are common</li> <li>• Control of morning glucose is troublesome</li> <li>• Severe hypoglycaemic events are recurrent</li> <li>• Presence of eating disorders</li> </ul> |

suggests that the likelihood of achievement of HbA<sub>1c</sub> targets in children treated with CSII is higher in children aged 6–12 years than in those aged over 12 years, possibly owing to greater parental involvement and the lack of pubertal hormonal influences.<sup>14</sup> More importantly, the change in HbA<sub>1c</sub> upon conversion from MDI to CSII depends upon the baseline level achieved on MDI: CSII is most beneficial in the most poorly controlled patients.<sup>15</sup> This presents a challenge worth contemplating in patients previously not considered candidates for CSII.

High HbA<sub>1c</sub> levels during MDI therapy are often linked with a high degree of variation in blood glucose levels; these patients may also be prone to hypoglycaemic episodes.<sup>15</sup> Evidence indicates that CSII can significantly reduce glucose variability or instability in adults and children.<sup>16,17</sup> This may be important, as large swings in blood glucose are associated with impaired well-being and school performance in children.<sup>18,19</sup>

NICE has made no recommendations with regard to the type of insulin to be used in CSII. Interestingly, Weinzimer *et al.* recently randomised almost 300 children and adolescents to 16 weeks of CSII therapy with insulin lispro or aspart.<sup>20</sup> Although a numerically greater reduction in HbA<sub>1c</sub> with aspart did not reach statistical significance, more patients treated with aspart (59.7%) achieved target HbA<sub>1c</sub> levels compared with patients treated with lispro (43.8%;  $p=0.04$ ).

### Hypoglycaemic episodes

Hypoglycaemic episodes remain problematic in many children treated with insulin, especially when achievement of low glycaemic targets is attempted. In principle, CSII should reduce the risk of hypoglycaemia, and indeed this has been established in some controlled studies in adults<sup>21</sup> and in before-and-after studies in children.<sup>13</sup> While previous meta-analyses have been inconclusive,<sup>4</sup> a recent meta-analysis of 21 studies revealed that CSII was associated with a 75% lower rate of severe hypoglycaemia than MDI (rate ratio of 4.19; 95% confidence intervals 2.86–6.13).<sup>4</sup> The reduction in hypoglycaemia was greatest in patients with a high hypoglycaemia rate on MDI. The three-centre, randomised, controlled INDIGO trial, due to commence in the UK in January 2009, will investigate the difference between MDI and CSII (both supported by a common educational programme) with regard to mild hypoglycaemic episodes.

### Flexibility

A pivotal advantage of CSII over MDI is the greater convenience of insulin administration. Programmable basal rates are delivered automatically and with unprecedented precision (down to incremental units as little as 0.025 units/h with the Animas® 2020 pump; Animas Corporation, UK), while bolus doses can easily be used to titrate insulin exposure around meals and activities and to correct hyperglycaemia. In toddlers and younger children, the smaller basal rate of 0.025 units/h may be particularly useful to deal with the challenges of administering very small amounts of insulin that otherwise would need to be diluted. Convenience may be particularly important in children,

in whom MDI administration is often difficult to achieve with sufficient accuracy (e.g. during school or daycare time). Some CSII pumps can also help patients to calculate their carbohydrate intake, thereby facilitating the calculation of bolus dose.

CSII is also more convenient than MDI with regard to injection frequency, as the subcutaneous cannula needs to be re-sited approximately once every 2–3 days, as compared with upwards of five injections per day in patients on MDI therapy. Limited data suggest that the effectiveness of CSII in children is related to the number of cannula sites used, perhaps owing to improved absorption.<sup>14</sup>

### Quality of life

CSII has been shown to improve the quality of life of adults with type 1 diabetes by reducing anxiety over hypoglycaemic episodes, enhancing flexibility (and thereby reducing the interference of the treatment with diet, lifestyle and family activities) and by increasing patient autonomy.<sup>1,21–23</sup> For similar reasons, CSII also has the potential to improve the well-being of children with type 1 diabetes, together with that of their parents and carers.<sup>10,24–26</sup> Treatment satisfaction appears to be higher among children randomised to CSII than to MDI.<sup>27</sup>

### Disadvantages of CSII in children

#### Competence and commitment

The safe and effective use of CSII requires high levels of self-care competence and motivation among patients and carers. However, it is important to emphasise that many of these aspects, such as the technicalities of blood glucose monitoring and carbohydrate counting, are common to intensive MDI therapy. Clearly, anyone wishing to use CSII must also be willing and able to use the equipment correctly and to maintain a sufficient stock of the necessary consumables. Accordingly, CSII should be initiated only by a specialist, multidisciplinary team and in conjunction with a structured, ongoing educational and monitoring programme.<sup>1</sup>

Some individuals do find the technology too complex and hence the selection of prospective users is important. Even 'successful' pump users vary in their use of the technology, with some sticking to the basic functions, while most exploit the full benefit of the programmable modes (which can include multiple variable basal rates, and adjustments for exercise and menstruation). However, anecdotal evidence suggests that those who do use the full range of functions have the best glycaemic control. Patients and carers must also be able to deal with the mechanical problems that may infrequently occur, such as problems with the insulin reservoir, blockages in the infusion set tubes, and the stability or compatibility of the insulin preparation.<sup>28,29</sup>

The sophistication of current CSII units also has implications for the healthcare staff who must interpret the substantial amounts of data collected by the machines and downloaded in the clinic. The presentation of these data within integrated, easily interpretable formats would be an important aid in this regard.

## Safety

Some researchers have detected a small increase in DKA in paediatric patients treated with CSII, as compared with MDI, especially early after CSII initiation.<sup>30</sup> However, other studies have not confirmed this, especially in patients with good compliance and adequate family support. Indeed, a large case-control study recently reported by Jakisch *et al.*<sup>12,30</sup> found that a lower baseline incidence of DKA in the CSII group was maintained throughout the 3 years of follow-up.<sup>13</sup> DKA in pump users is most likely to occur when patients do not recognise that the pump is not properly delivering the correct insulin dose. Thus, the problem can be minimised by proper training and monitoring, as recommended.

It is regrettable that a recent, well-publicised, retrospective analysis of mortality in adolescents on CSII published by the US Food and Drug Administration, based on mandated industry reports in the US (totalling 13 cases over 10 years),<sup>31</sup> did not place its findings in the context of the total number of patients treated with CSII, the substantial benefit provided to most users or the corresponding mortality rate in MDI users. There is no evidence that CSII is less safe than MDI and, indeed, given the safeguards built into the pumps (e.g. alarms), CSII has the potential to reduce the adverse effects of insulin therapy.

## Weight and capacity

The selection of a CSII pump is influenced by a variety of factors, including the size and weight of the device, ease of use (e.g. the illumination of the screen and the simplicity of the operating system), range of dose modes and increments, presence of dose calculator, facility to use glucose sensor, link up to a blood glucose meter, cost, warranty and customer services. The issue of size involves a compromise between convenience/discreteness and reservoir capacity. Generally, the weight of any unit can be problematic for infants and toddlers, but can be ameliorated with a host of clothing solutions.

## Conclusions

CSII offers the potential for improved glycaemic control in some paediatric patients with type 1 diabetes (especially those with poor control or frequent hypoglycaemic episodes) and may be preferred by patients and carers. CSII is particularly useful in younger children and, while current recommendations suggest that MDI should be tried first in older children, CSII can be instituted in the younger group without an MDI trial when the trial is deemed inappropriate or impractical.<sup>1</sup> Indeed, CSII should probably be considered for all paediatric patients.

Effective education and ongoing support tailored to the needs of children and parents are essential to ensure the cost-effective and safe use of CSII therapy. For the most part, this is not a unique, additional requirement of CSII. Rather, the specific education necessary for CSII use should build upon much needed improvements in the education of all patients receiving intensive therapy for type 1 diabetes.

## References

1. National Institute for Health and Clinical Excellence. NICE technology appraisal guidance 151. Continuous subcutaneous insulin infusion for the treatment of diabetes mellitus (review of technology appraisal guidance 57). London: National Institute for Health and Clinical Excellence, July 2008. <http://www.nice.org.uk/TA151> (Accessed 23 July 2008).
2. Weinzimer SA, Swan KL, Sikes KA *et al.* Emerging evidence for the use of insulin pump therapy in infants, toddlers, and preschool-aged children with type 1 diabetes. *Pediatr Diabetes* 2006; **7**(suppl 4):15–19.
3. Colquitt JL, Green C, Sidhu MK *et al.* Clinical and cost-effectiveness of continuous subcutaneous insulin infusion for diabetes. *Health Technol Assess* 2004; **8**(iii):1–171.
4. Jeitler K, Horvath K, Berghold A *et al.* Continuous subcutaneous insulin infusion versus multiple daily insulin injections in patients with diabetes mellitus: systematic review and meta-analysis. *Diabetologia* 2008; **51**:941–51.
5. Pickup JC, Sutton AJ. Severe hypoglycaemia and glycaemic control in type 1 diabetes: meta-analysis of multiple daily insulin injections versus continuous subcutaneous insulin infusion. *Diabet Med* 2008; **25**:765–74.
6. Doyle EA, Weinzimer SA, Steffen AT *et al.* A randomized, prospective trial comparing the efficacy of continuous subcutaneous insulin infusion with multiple daily injections using insulin glargine. *Diabetes Care* 2004; **27**:1554–8.
7. Cohen D, Weintrob N, Benzaquen H *et al.* Continuous subcutaneous insulin infusion versus multiple daily injections in adolescents with type 1 diabetes mellitus: a randomized open crossover trial. *J Pediatr Endocrinol Metab* 2003; **16**:1047–50.
8. Weintrob N, Benzaquen H, Galatzer A *et al.* Comparison of continuous subcutaneous insulin infusion and multiple daily injection regimens in children with type 1 diabetes: a randomized open crossover trial. *Pediatrics* 2003; **112**:559–64.
9. DiMeglio LA, Pottorff TM, Boyd SR *et al.* A randomized, controlled study of insulin pump therapy in diabetic preschoolers. *J Pediatr* 2004; **145**:380–4.
10. Fox LA, Buckloh LM, Smith SD *et al.* A randomized controlled trial of insulin pump therapy in young children with type 1 diabetes. *Diabetes Care* 2005; **28**:1277–81.
11. Weinzimer SA, Ahern JH, Doyle EA *et al.* Persistence of benefits of continuous subcutaneous insulin infusion in very young children with type 1 diabetes: a follow-up report. *Pediatrics* 2004; **114**:1601–5.
12. Sulli N, Shashaj B. Long-term benefits of continuous subcutaneous insulin infusion in children with Type 1 diabetes: a 4-year follow-up. *Diabet Med* 2006; **23**:900–6.
13. Jakisch BI, Wagner VM, Heidtmann B *et al.* Comparison of continuous subcutaneous insulin infusion (CSII) and multiple daily injections (MDI) in paediatric Type 1 diabetes: a multicentre matched-pair cohort analysis over 3 years. *Diabet Med* 2008; **25**:80–5.
14. McVean JF, Eickhoff JC, MacDonald MJ. Factors correlating with improved A1C in children using continuous subcutaneous insulin infusion. *Diabetes Care* 2007; **30**:2499–500.
15. Pickup JC, Kidd J, Burmiston S *et al.* Determinants of glycaemic control in type 1 diabetes during intensified therapy with multiple daily insulin injections or continuous subcutaneous insulin infusion: importance of blood glucose variability. *Diabetes Metab Res Rev* 2006; **22**:232–7.
16. Alemzadeh R, Palma-Sisto P, Holzum M *et al.* Continuous subcutaneous insulin infusion attenuated glycemic instability in preschool children with type 1 diabetes mellitus. *Diabetes Technol Ther* 2007; **9**:339–47.
17. Bruttomesso D, Crazzolara D, Maran A *et al.* In Type 1 diabetic patients with good glycaemic control, blood glucose variability is lower during continuous subcutaneous insulin infusion than during multiple daily injections with insulin glargine. *Diabet Med* 2008; **25**:326–32.
18. McCarthy AM, Lindgren S, Mengeling MA *et al.* Factors associated with academic achievement in children with type 1 diabetes. *Diabetes Care* 2003; **26**:112–17.

19. Martin DD, Davis EA, Jones TW. Acute effects of hyperglycaemia in children with type 1 diabetes mellitus: the patient's perspective. *J Pediatr Endocrinol Metab* 2006; **19**:927–36.
20. Weinzimer SA, Ternand C, Howard C *et al*. A randomized trial comparing continuous subcutaneous insulin infusion of insulin aspart versus insulin lispro in children and adolescents with type 1 diabetes. *Diabetes Care* 2008; **31**:210–15.
21. Hoogma RP, Hammond PJ, Gomis R *et al*. Comparison of the effects of continuous subcutaneous insulin infusion (CSII) and NPH-based multiple daily insulin injections (MDI) on glycaemic control and quality of life: results of the 5-nations trial. *Diabet Med* 2006; **23**:141–7.
22. Scheidegger U, Allemann S, Scheidegger K *et al*. Continuous subcutaneous insulin infusion therapy: effects on quality of life. *Swiss Med Wkly* 2007; **137**:476–82.
23. EQuality1 Study Group: Evaluation of QUALITY of Life and Costs in Diabetes Type 1, Nicolucci A, Maione A *et al*. Quality of life and treatment satisfaction in adults with Type 1 diabetes: a comparison between continuous subcutaneous insulin infusion and multiple daily injections. *Diabet Med* 2008; **25**:213–20.
24. McMahon SK, Airey FL, Marangou DA *et al*. Insulin pump therapy in children and adolescents: improvements in key parameters of diabetes management including quality of life. *Diabet Med* 2005; **22**:92–6.
25. Júlíusson PB, Graue M, Wentzel-Larsen T *et al*. The impact of continuous subcutaneous insulin infusion on health-related quality of life in children and adolescents with type 1 diabetes. *Acta Paediatr* 2006; **95**:1481–7.
26. Opiari-Arrigan L, Fredericks EM, Burkhart N *et al*. Continuous subcutaneous insulin infusion benefits quality of life in preschool-age children with type 1 diabetes mellitus. *Pediatr Diabetes* 2007; **8**:377–83.
27. Weintrop N, Benzaquen H, Galatzer A *et al*. Comparison of continuous subcutaneous insulin infusion and multiple daily injection regimens in children with type 1 diabetes: a randomized open crossover trial. *Pediatrics* 2003; **112**:559–64.
28. Guilhem I, Leguerrier AM, Lecordier F *et al*. Technical risks with subcutaneous insulin infusion. *Diabetes Metab* 2006; **32**:279–84.
29. Ponder SW, Skyler JS, Kruger DF *et al*. Unexplained hyperglycemia in continuous subcutaneous insulin infusion: evaluation and treatment. *Diabetes Educ* 2008; **34**:327–33.
30. Hanas R, Ludvigsson J. Hypoglycemia and ketoacidosis with insulin pump therapy in children and adolescents. *Pediatr Diabetes* 2006; **7**(suppl 4):32–8.
31. Cope JU, Morrison AE, Samuels-Reid J. Adolescent use of insulin and patient-controlled analgesia pump technology: a 10-year Food and Drug Administration retrospective study of adverse events. *Pediatrics* 2008; **121**:e1133–8.
